# Supplementary material
Source: publisher figshare collection journal article supplement (https://acs.figshare.com/ndownloader/files/5787969)
Supplement: Supplementary file 1 [file 5787969]

HEADER
REMARK Titan exported Molecule001
HETATM    1  C   UNK  0001      -1.803  -0.430   0.012
HETATM    2  C   UNK  0001      -0.680   0.548   0.052
HETATM    3  C   UNK  0001       0.802   0.382  -0.162
HETATM    4  O   UNK  0001      -0.893   1.823   0.043
HETATM    5  N   UNK  0001       1.241  -0.108   1.091
HETATM    6  O   UNK  0001       2.395  -0.471   1.352
HETATM    7  O   UNK  0001       0.284  -0.077   1.967
HETATM    8  C   UNK  0001       1.467  -0.149  -1.408
HETATM    9  H   UNK  0001      -2.670  -0.046   0.570
HETATM   10  H   UNK  0001      -2.106  -0.572  -1.043
HETATM   11  H   UNK  0001      -1.489  -1.398   0.425
HETATM   12  H   UNK  0001       1.234   0.478  -2.283
HETATM   13  H   UNK  0001       1.183  -1.194  -1.640
HETATM   14  H   UNK  0001       2.557  -0.126  -1.247
HETATM   15  H   UNK  0001       0.328   1.848  -0.052
CONECT    1    2    9   10   11
CONECT    2    1    3    4
CONECT    3    2    5    8
CONECT    4    2
CONECT    5    3    6    7
CONECT    6    5
CONECT    7    5
CONECT    8    3   12   13   14
CONECT    9    1
CONECT   10    1
CONECT   11    1
CONECT   12    8
CONECT   13    8
CONECT   14    8
END
